# Supplementary material for: PCNA-associated factor (KIAA0101/PCLAF) overexpression and gene copy number alterations in hepatocellular carcinoma tissues
Source: PubMed Central journal article supplement (PMC7981960; doi:10.1186/s12885-021-07994-3), 2021-03-20
Supplement: 12885_2021_7994_MOESM2_ESM.pdf [file 12885_2021_7994_MOESM2_ESM.pdf]

| No. | Case | age | Patho         | AFP      | tumor size | HBsAg_blood |
|-----|------|-----|---------------|----------|------------|-------------|
| 1   | 1    | ≥50 | HCC           | 60,500   | 19         | NEG         |
| 2   | 2    | <50 | HCC grade 2   | NEG      | 7          | NEG         |
| 3   | 3    | ≥50 | HCC grade 3   | 375.53   | 7          | NEG         |
| 4   | 4    | ≥50 | HCC           | 142.2    | 3.3        | NEG         |
| 5   | 5    | ≥50 | HCC           | 52       | 3          | POS         |
| 6   | 6    | <50 | HCC grade 3   | 418      | 4          | POS         |
| 7   | 7    | ≥50 | HCC grade 3   | 25       | 10         | POS         |
| 8   | 8    | <50 | HCC           | 12.66    | 9          | POS         |
| 9   | 9    | ≥50 | HCC           | 10,634   | 8          | NEG         |
| 10  | 10   | <50 | HCC           | 3.7      | 10         | POS         |
| 11  | 11   | <50 | HCC grade3    | >40,000  | 8          | POS         |
| 12  | 12   | <50 | HCC           | 261      | 4          | POS         |
| 13  | 13   | ≥50 | HCC           | 1,830    | 7          | POS         |
| 14  | 14   | <50 | HCC           | NEG      | 7          | POS         |
| 15  | 15   | ≥50 | HCC           | Not done | 5          | NEG         |
| 16  | 16   | <50 | HCC           | 2,070    | 6          | NEG         |
| 17  | 17   | ≥50 | HCC           | 2        | 3          | POS         |
| 18  | 18   | ≥50 | HCC           | 343      | 7.6        | POS         |
| 19  | 19   | ≥50 | HCC           | 2,330    | 10         | POS         |
| 20  | 20   | <50 | HCC           | 117      | 3.5        | POS         |
| 21  | 21   | ≥50 | HCC grade 2-3 | Not done | Not done   | Not done    |
| 22  | 22   | ≥50 | HCC           | 17,072   | 5.5        | NEG         |
| 23  | 23   | ≥50 | HCC           | 23       | 1.5        | POS         |
| 24  | 24   | ≥50 | HCC grade 1-2 | 18       | 3          | NEG         |
| 25  | 25   | <50 | HCC grade 3   | 17,900   | 3          | POS         |
| 26  | 26   | <50 | HCC grade 3   | Not done | 5          | POS         |
| 27  | 27   | <50 | HCC grade 2   | 8,312    | 9          | POS         |

|    |    |     |             |          |          |          |
|----|----|-----|-------------|----------|----------|----------|
| 28 | 28 | ≥50 | HCC         | 6,967    | 5        | POS      |
| 29 | 29 | ≥50 | HCC         | 4        | 10       | POS      |
| 30 | 30 | ≥50 | HCC         | 138      | 14       | POS      |
| 31 | 31 | <50 | HCC         | 320      | 8        | POS      |
| 32 | 32 | <50 | HCC         | 33,280   | 6        | POS      |
| 33 | 33 | ≥50 | HCC         | 14       | 2.2      | POS      |
| 34 | 34 | <50 | HCC         | 26.3     | 3        | POS      |
| 35 | 35 | <50 | HCC         | 390      | 5        | POS      |
| 36 | 36 | ≥50 | HCC         | 74.89    | 3        | POS      |
| 37 | 37 | <50 | HCC grade 3 | >40,000  | 9        | NEG      |
| 38 | 38 | <50 | HCC         | 34       | 2        | POS      |
| 39 | 39 | ≥50 | HCC         | 3.5      | 16       | NEG      |
| 40 | 40 | ≥50 | HCC         | Not done | Not done | Not done |
