# Supplementary material for: PCNA-associated factor (KIAA0101/PCLAF) overexpression and gene copy number alterations in hepatocellular carcinoma tissues
Source: PubMed Central journal article supplement (PMC7981960; doi:10.1186/s12885-021-07994-3), 2021-03-20
Supplement: 12885_2021_7994_MOESM3_ESM.pdf [file 12885_2021_7994_MOESM3_ESM.pdf]

| No. | Age | Patho                      | AFP      | Tumor Size (cm) | HBsAg_blood |
|-----|-----|----------------------------|----------|-----------------|-------------|
| 1   | ≥50 | HCC                        | 60,500   | 19              | NEG         |
| 2   | <50 | HCC grade 2                | NEG      | 7               | NEG         |
| 3   | ≥50 | HCC grade 3                | 375.53   | 7               | NEG         |
| 4   | ≥50 | HCC                        | 3        | 1               | POS         |
| 5   | ≥50 | HCC                        | 142.2    | 3.3             | NEG         |
| 6   | ≥50 | HCC                        | 52       | 3               | POS         |
| 7   | ≥50 | HCC                        | 242      | 3.5             | POS         |
| 8   | <50 | HCC                        | 418      | 4               | POS         |
| 9   | ≥50 | HCC                        | 25       | 10              | POS         |
| 10  | ≥50 | HCC with vascular Invasion | 23,640   | 8               | POS         |
| 11  | ≥50 | HCC                        | Not Done | 8               | NEG         |
| 12  | <50 | HCC and CIRRHOSIS          | 21       | 3               | NEG         |
| 13  | <50 | HCC grade 3                | >40,000  | 8               | POS         |
| 14  | <50 | HCC                        | 261      | 4               | POS         |
| 15  | ≥50 | HCC                        | ND       | 5               | NEG         |
| 16  | <50 | HCC                        | 2070     | 6               | NEG         |
| 17  | ≥50 | HCC                        | 2        | 3               | POS         |
| 18  | ≥50 | HCC                        | 343      | 7.6             | POS         |
| 19  | <50 | HCC                        | 1,780    | Not done        | POS         |

|    |     |               |          |      |     |
|----|-----|---------------|----------|------|-----|
| 20 | <50 | HCC           | 117      | 3.5  | POS |
| 21 | ≥50 | HCC           | 23       | 1.5  | POS |
| 22 | ≥50 | HCC grade 1-2 | 18       | 3    | NEG |
| 23 | <50 | HCC           | 17,900   | 3    | POS |
| 24 | <50 | HCC           | Not done | 5    | POS |
| 25 | <50 | HCC           | 8,312    | 9    | POS |
| 26 | ≥50 | HCC           | 138      | 14   | POS |
| 27 | ≥50 | HCC           | 14       | 2.2  | POS |
| 28 | <50 | HCC           | 33,280   | 6    | POS |
| 29 | <50 | HCC           | 26.3     | 3    | POS |
| 30 | <50 | HCC           | 251      | 5    | POS |
| 31 | <50 | HCC           | 390      | 5    | POS |
| 32 | ≥50 | HCC           | 74.89    | 3    | POS |
| 33 | <50 | HCC           | 34       | 2    | POS |
| 34 | ≥50 | HCC           | 3.5      | 16   | NEG |
| 35 | ≥50 | HCC           | 4.3      | 23.2 | POS |
| 36 | <50 | HCC           | 547      | 5    | POS |
