# Supplementary material for: PCNA-associated factor (KIAA0101/PCLAF) overexpression and gene copy number alterations in hepatocellular carcinoma tissues
Source: PubMed Central journal article supplement (PMC7981960; doi:10.1186/s12885-021-07994-3), 2021-03-20
Supplement: 12885_2021_7994_MOESM4_ESM.pdf [file 12885_2021_7994_MOESM4_ESM.pdf]

| Case no. | Age  | Tumor size | AFP    | HBsAg | Ki-67 | P53_T |
|----------|------|------------|--------|-------|-------|-------|
| 1        | ≥ 50 | 3          | 5.5    | pos   | 1     | pos   |
| 2        | ≥ 50 | 7          | 62     | neg   | 1     | neg   |
| 3        | ≥ 50 | 4          | 2.9    | pos   | 1     | neg   |
| 4        | ≥ 50 | 2          | 4.2    | pos   | 1     | neg   |
| 5        | ≥ 50 | 4.5        | 193    | pos   | 1     | neg   |
| 6        | ≥ 50 | 3          | 393    | pos   | 1     | neg   |
| 7        | ≥ 50 | 2.8        | 1885   | neg   | 1     | neg   |
| 8        | <50  | 4          | 79     | pos   | 1     | pos   |
| 9        | ≥ 50 | 8          | 2.9    | neg   | 1     | neg   |
| 10       | ≥ 50 | 4.2        | 38     | neg   | 1     | neg   |
| 11       | ≥ 50 | 2.2        | 2.2    | pos   | 1     | pos   |
| 12       | ≤ 50 | 13         | 60500  | pos   | 1     | pos   |
| 13       | ≥ 50 | 2          | 2      | pos   | 1     | neg   |
| 14       | ≥ 50 | 1.7        | 2      | neg   | 1     | pos   |
| 15       | ≥ 50 | 11.5       | 1219   | neg   | 2     | neg   |
| 16       | ≥ 50 | 2          | 2.9    | pos   | 1     | pos   |
| 17       | ≥ 50 | 5.5        | 1.5    | neg   | 1     | pos   |
| 18       | ≥ 50 | 7          | 279    | pos   | 1     | neg   |
| 19       | ≥ 50 | 2.5        | 4504   | pos   | 1     | neg   |
| 20       | <50  | 7          | 60,000 | pos   | 1     | neg   |
| 21       | ≥ 50 | 1.7        | 4.7    | pos   | 2     | pos   |
| 22       | ≥ 50 | 4.5        | 946    | neg   | 2     | pos   |
| 23       | ≥ 50 | 3          | 2.1    | pos   | 1     | neg   |
| 24       | ≥ 50 | 4.5        | 17     | pos   | 1     | pos   |
| 25       | ≥ 50 | 3          | 41521  | neg   | 1     | neg   |
| 26       | ≥ 50 | 8          | 235    | pos   | 1     | neg   |
| 27       | ≥ 50 | 9          | 520    | neg   | 1     | neg   |
| 28       | ≥ 50 | 2.5        | 7.17   | neg   | 1     | pos   |

|    |      |      |         |     |   |     |
|----|------|------|---------|-----|---|-----|
| 29 | ≥ 50 | 1.8  | 3.4     | neg | 1 | pos |
| 30 | <50  | 16.7 | 6584    | neg | 1 | neg |
| 31 | ≥ 50 | 2.5  | 4.8     | pos | 1 | pos |
| 32 | ≥ 50 | 7    | 66      | pos | 1 | neg |
| 33 | ≥ 50 | 5    | 3.3     | neg | 1 | neg |
| 34 | ≥ 50 | 4.3  | 23      | pos | 1 | neg |
| 35 | <50  | 16   | 18.6    | pos | 2 | neg |
| 36 | ≥ 50 | 4.5  | 17      | pos | 2 | neg |
| 37 | ≥ 50 | 2.5  | 1.8     | neg | 1 | neg |
| 38 | ≥ 50 | 6    | 7.3     | pos | 2 | neg |
| 39 | ≥ 50 | 10   | 61.3    | neg | 1 | neg |
| 40 | ≥ 50 | 8    | 5.1     | pos | 1 | neg |
| 41 | <50  | 2    | 93.6    | neg | 2 | pos |
| 42 | ≥ 50 | 3    | 4.2     | neg | 2 | neg |
| 43 | ≥ 50 | 3.8  | 51      | pos | 2 | pos |
| 44 | ≥ 50 | 7    | 2.9     | pos | 2 | neg |
| 45 | ≥ 50 | 12   | 495     | pos | 2 | pos |
| 46 | ≥ 50 | 19   | 60,500  | NEG | 2 | POS |
| 47 | <50  | 7    | NEG     | NEG | 1 | POS |
| 48 | ≥ 50 | 7    | 375.53  | NEG | 2 | POS |
| 49 | ≥ 50 | 3.3  | 142.2   | neg | 2 | NEG |
| 50 | ≥ 50 | 3    | 52      | POS | 1 | NEG |
| 51 | <50  | 4    | 418     | POS | 2 | NEG |
| 52 | ≥ 50 | 10   | 25      | POS | 2 | POS |
| 53 | <50  | 9    | 12.66   | POS | 2 | NEG |
| 54 | ≥ 50 | 8    | 10,634  | neg | 1 | neg |
| 55 | <50  | 10   | 3.7     | pos | 2 | pos |
| 56 | ≥ 50 | 4X6  | 32      | NEG | 2 | POS |
| 57 | <50  | 8    | >40,000 | POS | 2 | NEG |

|    |      |     |        |     |   |     |
|----|------|-----|--------|-----|---|-----|
| 58 | <50  | 4   | 261    | POS | 2 | NEG |
| 59 | ≥ 50 | 5   | 2,566  | pos | 1 | pos |
| 60 | ≥ 50 | 5   | ND     | neg | 2 | NEG |
| 61 | ≥ 50 | 3   | 2      | pos | 2 | POS |
| 62 | ≥ 50 | 7.6 | 343    | pos | 1 | NEG |
| 63 | <50  | 3.5 | 117    | POS | 1 | NEG |
| 64 | ≥ 50 | 5.5 | 17,072 | neg | 2 | NEG |
| 65 | ≥ 50 | 1.5 | 23     | POS | 1 | NEG |
| 66 | ≥ 50 | 3   | 18     | NEG | 2 | POS |
| 67 | <50  | 3   | 17,900 | pos | 2 | POS |
| 68 | <50  | 5   | ND     | pos | 1 | NEG |
| 69 | <50  | 9   | 8,312  | pos | 2 | NEG |
| 70 | ≥ 50 | 5   | 6,967  | POS | 2 | NEG |
| 71 | ≥ 50 | 10  | 4      | POS | 2 | NEG |
| 72 | ≥ 50 | 2.2 | 14     | pos | 2 | neg |
| 73 | <50  | 8   | 320    | pos | 2 | NEG |
| 74 | <50  | 6   | 33,280 | POS | 2 | POS |
| 75 | ≥ 50 | 10  | 2,330  | POS | 2 | POS |
| 76 | <50  | 3   | 26.3   | POS | 2 | NEG |
| 77 | <50  | 5   | 251    | pos | 2 | POS |
| 78 | <50  | 4.5 | 390    | pos | 2 | POS |
| 79 | <50  | 2   | 34     | POS | 2 | POS |
| 80 | ≥ 50 | 16  | 3.5    | NEG | 1 | NEG |
| 81 | ≥ 50 | 2.8 | 417    | neg | 2 | pos |

Ki-67 : 1=<10%, 2= ≥ 10%
